# Supplementary material for: Studies on the Effects of Fermentation on the Phenolic Profile and Biological Activity of Three Cultivars of Kale
Source: MDPI journal article supplement (doi:10.3390/molecules29081727), 2024-04-11

Table S1. Fingerprints of the analyzed extracts recorded in both negative (above) and positive (below) ion mode

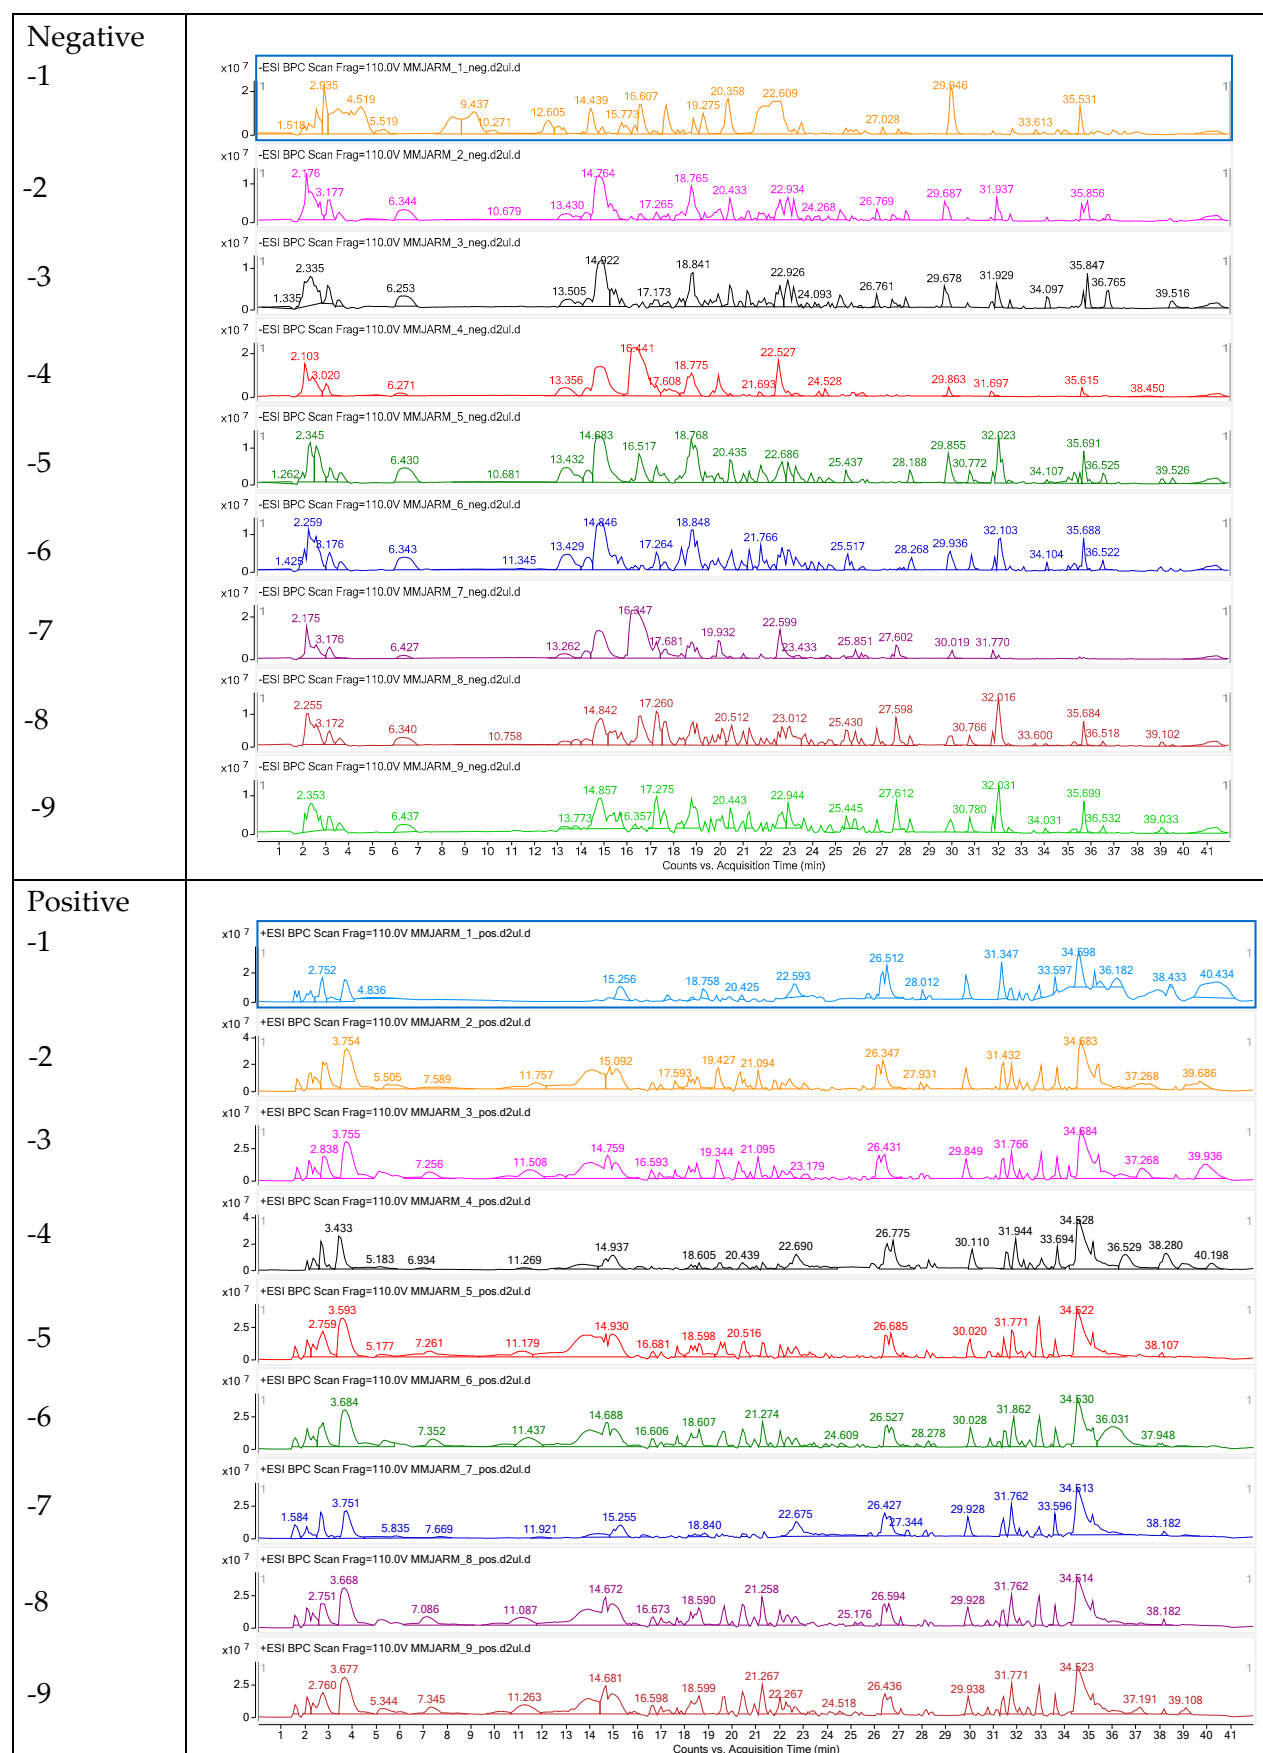

Supplement: s1 [file s1]
